# Supplementary figures and images for: Advanced metal–organic frameworks for superior carbon capture, high-performance energy storage and environmental photocatalysis – a critical review
Source: Royal Society of Chemistry journal article supplement (doi:10.1039/d4ta03877k), 2024-01-01

## Graphical Abstract

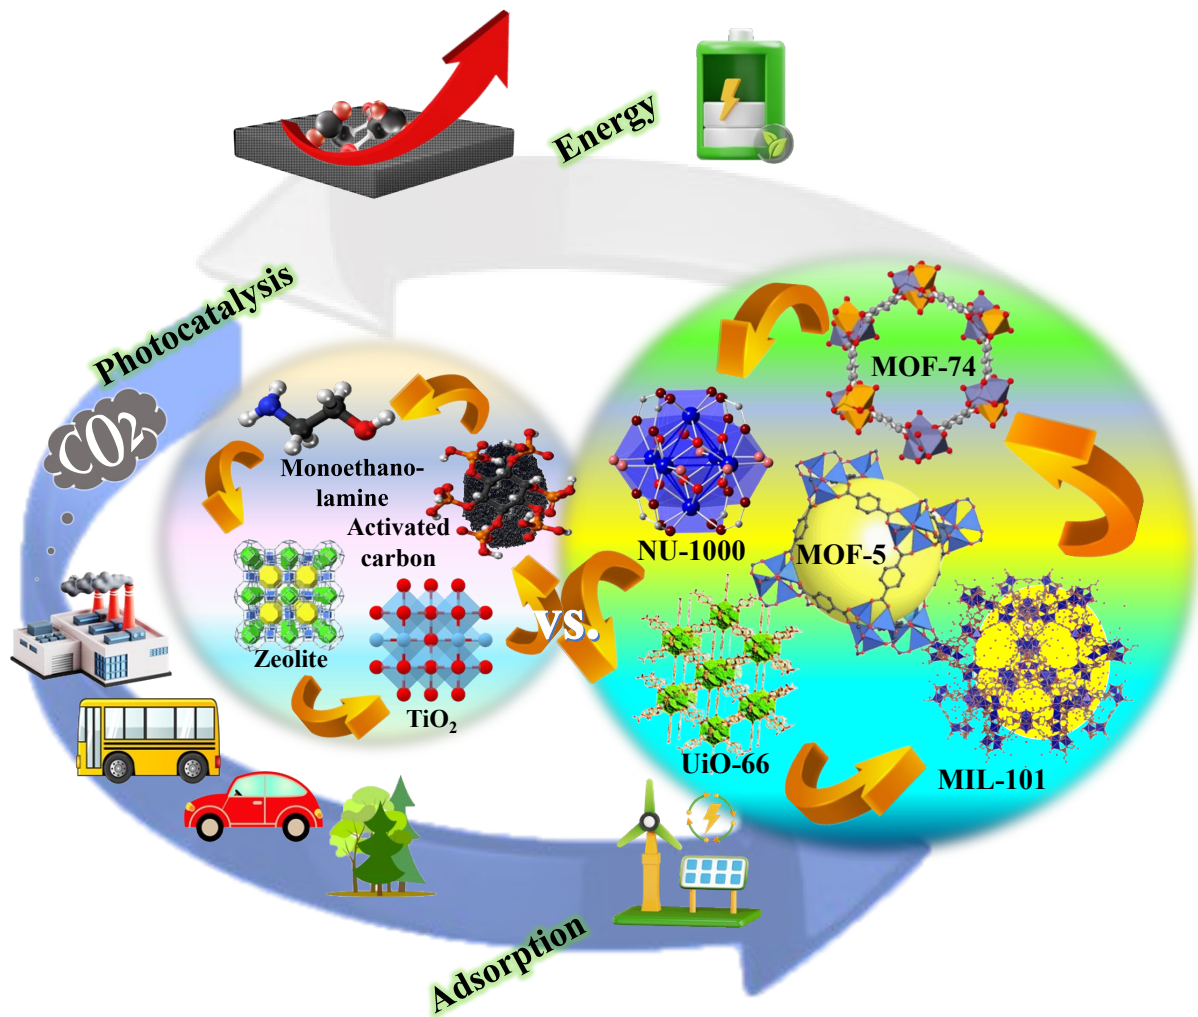

Supplement: d4ta03877k1.pdf [file d4ta03877k1.pdf]
